# Supplementary material for: Retinal microvasculature dysfunction is associated with Alzheimer’s disease and mild cognitive impairment
Source: PubMed Central journal article supplement (PMC7718666; doi:10.1186/s13195-020-00724-0), 2020-12-04
Supplement: 13195_2020_724_MOESM1_ESM.pdf [file 13195_2020_724_MOESM1_ESM.pdf]

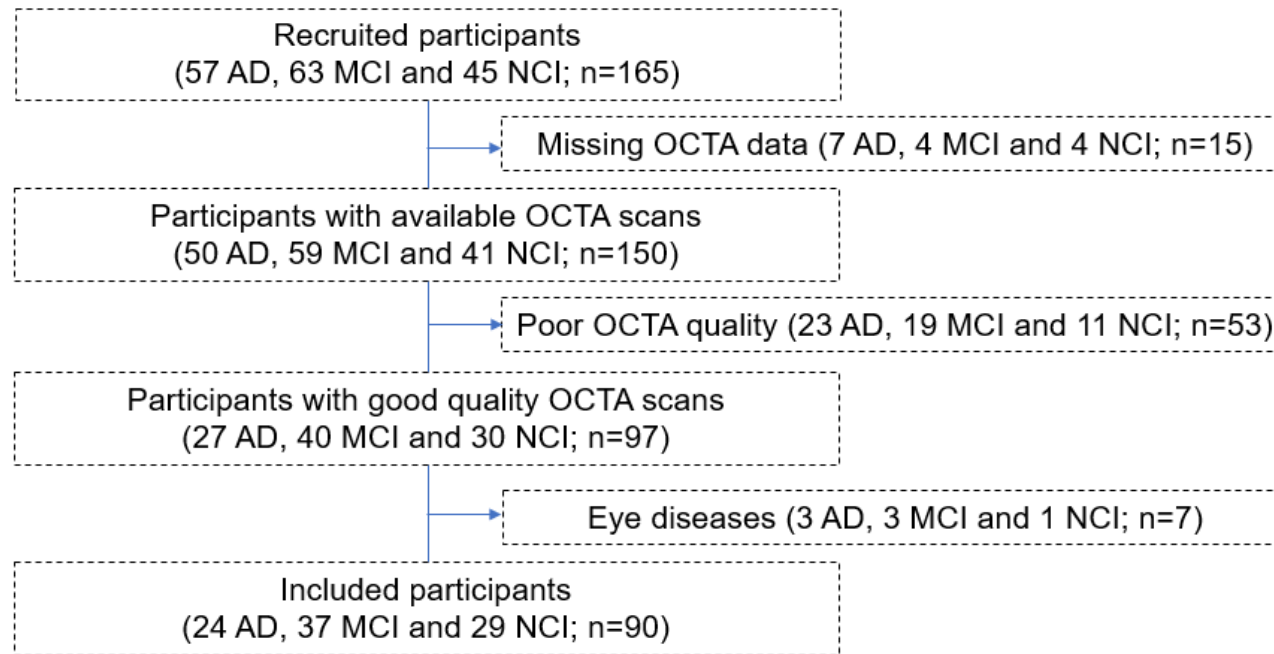

**Figure S1:** Identification of study participants. Of the 165 participants, we excluded participants who were unable to complete OCTA scanning due to fatigue (n=15), poor scan quality (n=53), and presence of eye diseases (n=7). Among the 90 participants included for the analysis, 24 were Alzheimer’s disease (AD) participants, 37 were mild cognitive impairment (MCI) participants, and 29 were controls.

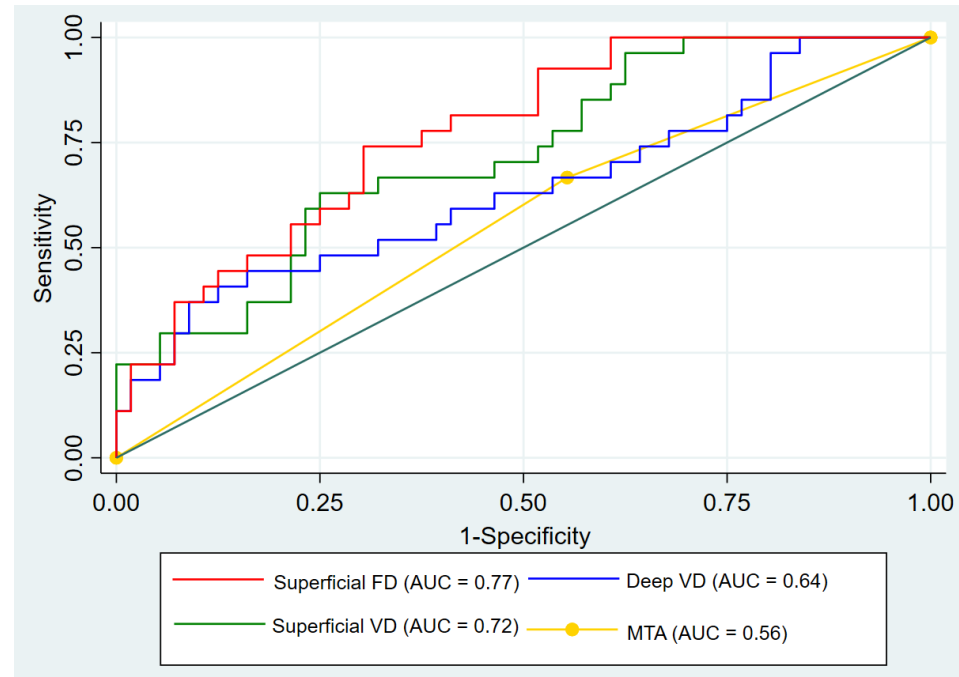

**Figure S2:** Receiver operating characteristic curves and corresponding AUCs for the top 3 parameters for discriminating AD/MCI from controls as compared to MTA scores  $\geq 2$ . FD = fractal dimension; MTA = medial temporal atrophy; and VD = vessel density.

**Table S1. Multivariate analysis of OCTA metrics with MMSE scores**

| OCTA metrics                                  | Superficial capillary plexus |               |         | Deep capillary plexus |               |         |
|-----------------------------------------------|------------------------------|---------------|---------|-----------------------|---------------|---------|
|                                               | $\beta$                      | 95 CI         | P value | $\beta$               | 95 CI         | P value |
| Vessel density (mm <sup>-1</sup> )            | 0.02                         | -0.04 to 0.04 | 0.909   | 0.02                  | -0.04 to 0.08 | 0.473   |
| Fractal dimension                             | 0.04                         | -0.04 to 0.05 | 0.855   | 0.01                  | -0.01 to 0.01 | 0.105   |
| Perfusion density of large vessels (%)        | -0.01                        | -0.06 to 0.05 | 0.851   | -                     | -             | -       |
| Foveal avascular zone area (mm <sup>2</sup> ) | -0.04                        | -0.05 to 0.04 | 0.988   | -0.04                 | -0.05 to 0.01 | 0.961   |

Confidence intervals (CI), mini-mental state exam (MMSE) and standard deviation (SD).

\* Adjusted for age, gender, race, diabetes, blood pressure (systolic and diastolic levels) and signal strength of OCTA scans.

**Table S2. Multivariate analysis of OCTA metrics with medial temporal atrophy (MTA)**

| OCTA metrics                                  | Superficial capillary plexus |                 |         | Deep capillary plexus |                 |         |
|-----------------------------------------------|------------------------------|-----------------|---------|-----------------------|-----------------|---------|
|                                               | $\beta$                      | 95 CI           | P value | $\beta$               | 95 CI           | P value |
| Vessel density (mm <sup>-1</sup> )            | 0.01                         | -0.31 to 0.32   | 0.973   | -0.23                 | -0.71 to 0.24   | 0.327   |
| Fractal dimension                             | -0.001                       | -0.004 to 0.003 | 0.935   | -0.001                | -0.005 to 0.003 | 0.678   |
| Perfusion density of large vessels (%)        | 0.12                         | -0.25 to 0.49   | 0.527   | -                     | -               | -       |
| Foveal avascular zone area (mm <sup>2</sup> ) | -0.02                        | -0.06 to 0.02   | 0.307   | -0.02                 | -0.14 to 0.10   | 0.740   |

Confidence intervals (CI), medial temporal atrophy (MTA), and standard deviation (SD).

\* Adjusted for age, gender, race, diabetes, blood pressure (systolic and diastolic levels) and signal strength of OCTA scans.

**Table S3. Multivariate analysis of OCTA metrics with global cortical atrophy (GCA)**

| OCTA metrics                                  | Superficial capillary plexus |                 |         | Deep capillary plexus |                 |         |
|-----------------------------------------------|------------------------------|-----------------|---------|-----------------------|-----------------|---------|
|                                               | $\beta$                      | 95 CI           | P value | $\beta$               | 95 CI           | P value |
| Vessel density (mm <sup>-1</sup> )            | -0.13                        | -0.47 to 0.22   | 0.472   | -0.07                 | -0.58 to 0.43   | 0.769   |
| Fractal dimension                             | -0.001                       | -0.005 to 0.002 | 0.459   | 0.001                 | -0.003 to 0.005 | 0.633   |
| Perfusion density of large vessels (%)        | -0.05                        | -0.44 to 0.34   | 0.802   | -                     | -               | -       |
| Foveal avascular zone area (mm <sup>2</sup> ) | -0.02                        | -0.06 to 0.02   | 0.275   | -0.03                 | -0.15 to 0.09   | 0.582   |

Confidence intervals (CI), global cortical atrophy (GCA), and standard deviation (SD).

\* Adjusted for age, gender, race, diabetes, blood pressure (systolic and diastolic levels) and signal strength of OCTA scans.

**Table S4. Multivariate analysis of OCTA metrics with white matter hyperintensities (WMH)**

| OCTA metrics                                  | Superficial capillary plexus |                 |         | Deep capillary plexus |                 |         |
|-----------------------------------------------|------------------------------|-----------------|---------|-----------------------|-----------------|---------|
|                                               | $\beta$                      | 95 CI           | P value | $\beta$               | 95 CI           | P value |
| Vessel density (mm <sup>-1</sup> )            | -0.03                        | -0.34 to 0.29   | 0.864   | -0.03                 | -0.50 to 0.45   | 0.904   |
| Fractal dimension                             | -0.002                       | -0.003 to 0.003 | 0.927   | 0.001                 | -0.003 to 0.005 | 0.519   |
| Perfusion density of large vessels (%)        | 0.37                         | -0.35 to 0.38   | 0.931   | -                     | -               | -       |
| Foveal avascular zone area (mm <sup>2</sup> ) | -0.01                        | -0.04 to 0.03   | 0.909   | 0.01                  | -0.11 to 0.11   | 0.972   |

Confidence intervals (CI), standard deviation (SD) and white matter hyperintensities (WMH).

\* Adjusted for age, gender, race, diabetes, blood pressure (systolic and diastolic levels) and signal strength of OCTA scans.

**Table S5. Diagnostic performance for cognitive status in decreasing order of the most relevant parameters**

| Parameter                        | Area under the Receiver Operating Characteristic Curve (standard error) | Sensitivity at 41.5% Specificity | P value      |
|----------------------------------|-------------------------------------------------------------------------|----------------------------------|--------------|
| <b>A) MCI/AD vs Control</b>      |                                                                         |                                  |              |
| 1. Superficial fractal dimension | 0.77 (0.05)                                                             | 85.7                             | Reference    |
| 2. Superficial vessel density    | 0.72 (0.06)                                                             | 64.3                             | 0.358        |
| 3. Deep vessel density           | 0.64 (0.07)                                                             | 92.9                             | 0.141        |
| 4. MTA scores $\geq 2$           | 0.56 (0.06)                                                             | 65.5                             | <b>0.010</b> |

Results for sensitivity is expressed as percentages. P value indicates the paired comparisons with the best parameter (reference group).
